# Supplementary material for: Insights into Triterpene Acids in Fermented Mycelia of Edible Fungus Poria cocos by a Comparative Study
Source: PubMed Central journal article supplement (PMC6479485; doi:10.3390/molecules24071331), 2019-04-04
Supplement: molecules-24-01331-s001.pdf [file molecules-24-01331-s001.pdf]

## Supplementary Table S1

Identification of triterpene compounds in the natural and fermented parts of *Poria cocos* using HPLC-QTOF-MS/MS

| No <sup>a</sup> | t <sub>r</sub><br>(min) | Precursor<br>(m/z) | Mass<br>(m/z) | Error<br>(ppm) | MS/MS<br>(m/z)                                                         | Formula                                        | Identification                                                  |
|-----------------|-------------------------|--------------------|---------------|----------------|------------------------------------------------------------------------|------------------------------------------------|-----------------------------------------------------------------|
| 1               | 7.28                    | 513.3229           | 514.3305      | -2.09          | 513.3224;495.3069;439.2845                                             | C <sub>31</sub> H <sub>46</sub> O <sub>6</sub> | Poricoic acid F                                                 |
| 2               | 7.65                    | 499.3070           | 500.3147      | -1.74          | 499.3417;481.3343;427.2849; 349.2531                                   | C <sub>30</sub> H <sub>44</sub> O <sub>6</sub> | Poricoic acid E                                                 |
| 3               | 8.41                    | 499.3070           | 500.3508      | -1.17          | 499.3417;481.3343;405.2818;389.2661; 97.0658                           | C <sub>31</sub> H <sub>48</sub> O <sub>5</sub> | Poricoic acid H isomer                                          |
| 4               | 8.63                    | 513.3222           | 514.3298      | -0.73          | 513.3224;495.3103;439.2850;421.2754                                    | C <sub>31</sub> H <sub>46</sub> O <sub>6</sub> | Poricoic acid D                                                 |
| 5               | 9.06                    | 513.3222           | 514.3295      | -0.20          | 513.3204;495.3041;439.2969;421.2718                                    | C <sub>31</sub> H <sub>46</sub> O <sub>6</sub> | Poricoic acid D                                                 |
| 6               | 9.83                    | 485.3275           | 486.3346      | -0.11          | 485.3295;467.3188;441.3442;439.3192;407.2945;375.2642                  | C <sub>30</sub> H <sub>46</sub> O <sub>5</sub> | Poricoic acid G                                                 |
| 7               | 10.98                   | 499.3436           | 500.3509      | -1.38          | 499.3416;481.3313;455.3554;437.3392;21.3084;409.2810;193.1603;97.0657  | C <sub>31</sub> H <sub>48</sub> O <sub>5</sub> | Poricoic acid H                                                 |
| 8               | 11.87                   | 497.3286           | 498.3372      | 6.44           | 497.3285;453.3351;423.2968                                             | C <sub>31</sub> H <sub>46</sub> O <sub>5</sub> | 25-Hydroxyporicoic acid C                                       |
| 9               | 13.74                   | 513.3599           | 514.3664      | -1.17          | 513.3263;469.3342;453.2933;425.2707                                    | C <sub>32</sub> H <sub>50</sub> O <sub>5</sub> | Poricoic acid HM                                                |
| 10              | 14.67                   | 497.3283           | 498.3368      | -4.56          | 497.3285;455.3552;437.3430;409.3135                                    | C <sub>31</sub> H <sub>46</sub> O <sub>5</sub> | Poricoic acid BM                                                |
| 11              | 15.44                   | 469.337            | 470.3409      | -0.02          | 469.3347;453.3451;407.3258;309.1855;291.2220                           | C <sub>30</sub> H <sub>46</sub> O <sub>4</sub> | 3β,16α-Dihydroxylanosta-7,9(11), 24-trien-21-oic acid           |
| 12              | 16.16                   | 467.3180           | 468.3255      | -3.37          | 407.2960;391.2635;375.2407;321.2227;255.1381;227.1500;179.1477;71.0150 | C <sub>30</sub> H <sub>44</sub> O <sub>4</sub> | 16-Deoxyporicoic acid B                                         |
| 13              | 17.84                   | 469.3334           | 470.3408      | 0.32           | 469.3311;407.2964;423.3253;393.2792;375.2671                           | C <sub>30</sub> H <sub>46</sub> O <sub>4</sub> | 16α-Hydroxydehydrotrametenolic acid                             |
| 14              | 18.86                   | 471.3488           | 472.3563      | -2.16          | 409.3115;337.2535;275.2020;245.1907;207.1766;137.0988; 97.0668         | C <sub>30</sub> H <sub>48</sub> O <sub>4</sub> | 16α-Hydroxytrametenolic acid                                    |
| 15              | 19.50                   | 483.3129           | 484.3203      | -0.19          | 483.3108;465.2995;409.2740;391.2641;365.2832                           | C <sub>30</sub> H <sub>44</sub> O <sub>5</sub> | Poricoic acid B                                                 |
| 16              | 21.32                   | 483.3467           | 484.3565      | 0.18           | 483.3471;437.3432;421.3128;391.2941;311.2039;97.0661                   | C <sub>31</sub> H <sub>48</sub> O <sub>4</sub> | Dehydrotumulosic acid                                           |
| 17              | 21.98                   | 497.3286           | 498.3368      | -4.54          | 453.3384;423.2907;397.2740;211.1484;71.0154                            | C <sub>31</sub> H <sub>46</sub> O <sub>5</sub> | 3-Oxo-16α,25-dihydroxy-Lanosta-7,9(11),24(31)-trien-21-oic acid |
| 18              | 22.55                   | 497.3284           | 498.3357      | 0.08           | 497.3256;479.3141;453.3358;423.2888;379.2997;211.1549;73.0322;61.9908  | C <sub>31</sub> H <sub>46</sub> O <sub>5</sub> | Poricoic acid A                                                 |
| 19              | 22.58                   | 485.3308           | 486.3381      | -7.42          | 485.3640;467.3478;423.3276;337.2547;97.0667                            | C <sub>31</sub> H <sub>46</sub> O <sub>5</sub> | Tumulosic acid                                                  |

|    |       |          |          |       |                                                                         |                                                |                                                       |
|----|-------|----------|----------|-------|-------------------------------------------------------------------------|------------------------------------------------|-------------------------------------------------------|
| 20 | 23.80 | 469.3339 | 470.3441 | -0.23 | 407.2907;375.2695;273.1857;179.1426; 97.0663                            | C <sub>30</sub> H <sub>46</sub> O <sub>4</sub> | 3β,16α-Dihydroxylanosta-7,9(11), 24-trien-21-oic acid |
| 21 | 24.74 | 543.3709 | 544.3779 | -2.79 | 467.3524;337.2531;221.1909;137.0964;75.0094                             | C <sub>33</sub> H <sub>52</sub> O <sub>6</sub> | 25-Hydroxypachymic acid                               |
| 22 | 26.56 | 481.3336 | 482.3410 | -0.35 | 481.3318;463.3230;435.3262;419.3022;405.2794;387.2673;311.2010;97.0655  | C <sub>31</sub> H <sub>46</sub> O <sub>4</sub> | Polyporenic acid C                                    |
| 23 | 27.50 | 483.3491 | 484.3565 | -2.46 | 421.3130;389.2822;337.2527;273.1873;193.1594;97.0662                    | C <sub>31</sub> H <sub>48</sub> O <sub>4</sub> | 16α-Hydroxyeburiconic acid                            |
| 24 | 33.47 | 511.3441 | 512.3512 | 0.53  | 511.3416;493.3261;449.3133;389.2998;369.2028;59.0152                    | C <sub>32</sub> H <sub>48</sub> O <sub>5</sub> | 3-O-acetyl-16α-hydroxy-dehydrotrametenolic acid       |
| 25 | 35.08 | 513.3587 | 514.3675 | -3.28 | 513.3575;483.3116;451.3206;391.2995;207.1741;179.1430;59.0153           | C <sub>32</sub> H <sub>50</sub> O <sub>5</sub> | 3-O-acetyl-16α-hydroxy-trametenolic acid              |
| 26 | 36.41 | 525.3604 | 526.3674 | -2.97 | 525.3604;507.3495;481.3270;465.3300;59.0154                             | C <sub>33</sub> H <sub>50</sub> O <sub>5</sub> | Dehydropachymic acid                                  |
| 27 | 37.75 | 527.3741 | 528.3833 | -3.39 | 527.3741;497.3233;465.3373;405.3169;221.1958;59.0152                    | C <sub>33</sub> H <sub>52</sub> O <sub>5</sub> | Pachymic acid                                         |
| 28 | 40.86 | 453.3386 | 454.3460 | -2.87 | 453.3386;435.3262;423.0840;71.2583;337.2547;323.2377; 309.2204; 97.0659 | C <sub>30</sub> H <sub>46</sub> O <sub>3</sub> | Dehydrotrametenolic acid                              |
| 29 | 42.19 | 455.3539 | 156.3612 | -1.96 | 425.3047;373.2741;339.2681;295.2078;141.0890                            | C <sub>30</sub> H <sub>48</sub> O <sub>3</sub> | Trametenolic acid                                     |
| 30 | 43.10 | 467.3484 | 468.3614 | -2.23 | 467.3484;437.3045;405.3093;371.2584;337.2523;323.2377; 97.0681          | C <sub>31</sub> H <sub>48</sub> O <sub>3</sub> | Dehydroeburicoic acid                                 |
| 31 | 44.37 | 469.3681 | 470.3752 | 1.60  | 469.3654;439.3154;373.2816;339.2669;97.0613                             | C <sub>31</sub> H <sub>50</sub> O <sub>3</sub> | Eburicoic acid                                        |

<sup>a</sup>, the No. correspond to the peak No. in figure 2.
